# Supplementary material for: Mineral Nutrition of Naturally Growing Scots Pine and Norway Spruce under Limited Water Supply
Source: MDPI journal article supplement (doi:10.3390/plants11192652), 2022-10-09
Supplement: s1 [file s1]

**Table S1.** pH and contents of nutrients at 4 depths (I – 5-15 cm, II – 25-35 cm, III – 60-70 cm, and IV – 110-120 cm) for pine-inhabited Site III (arid) and Site II (normal) and for spruce-inhabited Site II (arid) and Site (I) (normal).

| Parameter | Depth, cm | Pine stands      |            |                 |            | Spruce stands   |            |                |            |
|-----------|-----------|------------------|------------|-----------------|------------|-----------------|------------|----------------|------------|
|           |           | Normal (Site II) |            | Arid (Site III) |            | Normal (Site I) |            | Arid (Site II) |            |
|           |           | N3               | N24        | A3              | A24        | N3              | N24        | A3             | A24        |
| pH        | 5-15      | 4.24±0.11        | 3.88±0.06  | 4.44±0.08       | 4.24±0.04  | 3.46±0.03       | 3.74±0.27  | 4.24±0.11      | 3.88±0.06  |
|           | 25-35     | 4.70±0.07        | 4.58±0.02  | 4.88±0.05       | 4.57±0.05  | 3.72±0.03       | 3.69±0.02  | 4.70±0.07      | 4.58±0.02  |
|           | 60-70     | 4.77±0.05        | 4.66±0.03  | 4.80±0.05       | 4.48±0.05  | 4.17±0.07       | 4.12±0.03  | 4.77±0.05      | 4.66±0.03  |
|           | 110-120   | ND               | 4.28±0.07  | ND              | 4.61±0.06  | ND              | 4.27±0.08  | ND             | 4.28±0.07  |
| K, mg/kg  | 5-15      | 1.53±0.20        | 6.02±0.39  | 3.89±0.59       | 6.45±0.74  | 6.29±0.95       | 5.79±0.24  | 1.53±0.20      | 6.02±0.39  |
|           | 25-35     | 1.22±0.28        | 2.71±0.24  | 2.30±0.43       | 4.93±0.98  | 4.38±0.36       | 4.69±0.44  | 1.22±0.28      | 2.71±0.24  |
|           | 60-70     | 1.33±0.25        | 3.05±0.33  | 2.05±0.49       | 5.59±0.82  | 6.96±1.04       | 8.05±0.56  | 1.33±0.25      | 3.05±0.33  |
|           | 110-120   | ND               | 3.55±0.47  | ND              | 3.71±0.48  | ND              | 8.88±0.66  | ND             | 3.55±0.47  |
| Ca, mg/kg | 5-15      | 28.6±6.5         | 38.2±6.9   | 139.3±19.2      | 71.4±10.8  | 11.3±3.0        | 28.1±3.8   | 28.6±6.5       | 38.2±6.9   |
|           | 25-35     | 34.6±4.5         | 42.4±4.4   | 53.5±5.0        | 39.6±8.1   | 2.22±0.75       | 10.5±1.9   | 34.6±4.5       | 42.4±4.4   |
|           | 60-70     | 27.1±6.7         | 23.6±1.6   | 23.0±2.7        | 32.3±9.4   | 36.7±9.8        | 43.2±6.9   | 27.1±6.7       | 23.6±1.6   |
|           | 110-120   | ND               | 14.9±2.8   | ND              | 6.45±2.80  | ND              | 60.5±11.7  | ND             | 14.9±2.8   |
| Mg, mg/kg | 5-15      | 0.57±0.10        | 2.01±0.34  | 3.40±0.28       | 1.68±0.24  | 2.67±0.43       | 1.82±0.37  | 0.57±0.10      | 2.01±0.34  |
|           | 25-35     | 0.52±0.08        | 0.48±0.06  | 0.87±0.30       | 0.88±0.40  | 0.80±0.18       | 0.84±0.13  | 0.52±0.08      | 0.48±0.06  |
|           | 60-70     | 0.43±0.11        | 0.23±0.06  | 0.41±0.07       | 0.68±0.19  | 2.36±1.02       | 1.56±0.28  | 0.43±0.11      | 0.23±0.06  |
|           | 110-120   | ND               | 0.27±0.15  | ND              | 0.10±0.03  | ND              | 2.67±1.05  | ND             | 0.27±0.15  |
| P, mg/kg  | 5-15      | 1.05±0.40        | 0.97±0.17  | 0.54±0.08       | 0.62±0.07  | 0.77±0.12       | 0.81±0.06  | 1.05±0.40      | 0.97±0.17  |
|           | 25-35     | 6.16±1.31        | 3.75±0.96  | 1.13±0.17       | 0.82±0.10  | 0.38±0.04       | 1.30±0.41  | 6.16±1.31      | 3.75±0.96  |
|           | 60-70     | 5.70±1.59        | 3.47±0.92  | 0.61±0.09       | 1.15±0.11  | 6.19±0.93       | 5.76±0.45  | 5.70±1.59      | 3.47±0.92  |
|           | 110-120   | ND               | 2.45±0.45  | ND              | 0.67±0.25  | ND              | 5.88±0.44  | ND             | 2.45±0.45  |
| Fe, mg/kg | 5-15      | 4.87±1.75        | 22.95±2.30 | 12.23±3.38      | 12.40±1.93 | 4.41±0.83       | 10.11±3.19 | 4.87±1.75      | 22.95±2.30 |
|           | 25-35     | 12.96±3.16       | 6.03±1.17  | 6.42±0.53       | 9.77±0.92  | 3.13±0.43       | 14.46±3.52 | 12.96±3.16     | 6.03±1.17  |
|           | 60-70     | 12.45±2.56       | 15.80±5.58 | 3.57±0.56       | 9.27±1.64  | 21.78±3.65      | 24.52±1.74 | 12.45±2.56     | 15.80±5.58 |
|           | 110-120   | ND               | 2.80±0.56  | ND              | 1.92±0.49  | ND              | 21.95±2.88 | ND             | 2.80±0.56  |
| Mn, mg/kg | 5-15      | 0.60±0.11        | 1.68±0.20  | 3.70±1.18       | 3.10±0.48  | 1.23±0.23       | 0.99±0.20  | 0.60±0.11      | 1.68±0.20  |
|           | 25-35     | 0.19±0.01        | 0.10±0.01  | 0.53±0.08       | 0.70±0.13  | 0.41±0.06       | 2.90±0.90  | 0.19±0.01      | 0.10±0.01  |
|           | 60-70     | 0.39±0.10        | 0.08±0.01  | 0.41±0.04       | 0.31±0.07  | 4.31±0.95       | 7.95±1.10  | 0.39±0.10      | 0.08±0.01  |
|           | 110-120   | ND               | 0.10±0.01  | ND              | 0.15±0.01  | ND              | 3.88±0.75  | ND             | 0.10±0.01  |

|           |         |           |           |           |           |           |           |           |           |
|-----------|---------|-----------|-----------|-----------|-----------|-----------|-----------|-----------|-----------|
| Zn, mg/kg | 5-15    | 0.11±0.01 | 0.21±0.02 | 0.15±0.02 | 0.15±0.04 | 0.33±0.08 | 0.20±0.02 | 0.11±0.01 | 0.21±0.02 |
|           | 25-35   | 0.11±0.03 | 0.08±0.02 | 0.03±0.01 | 0.08±0.02 | 0.12±0.02 | 0.14±0.02 | 0.11±0.03 | 0.08±0.02 |
|           | 60-70   | 0.04±0.01 | 0.04±0.01 | 0.02±0.00 | 0.07±0.03 | 0.23±0.03 | 0.23±0.03 | 0.04±0.01 | 0.04±0.01 |
|           | 110-120 | ND        | 0.06±0.01 | ND        | 0.04±0.02 | ND        | 0.51±0.13 | ND        | 0.06±0.01 |
