# Supplementary material for: Mineral Nutrition of Naturally Growing Scots Pine and Norway Spruce under Limited Water Supply
Source: MDPI journal article supplement (doi:10.3390/plants11192652), 2022-10-09
Supplement: s1 [file s1]

**Table S2.** Nutrient contents in wood, needles and bark of pine and spruce.

| Nutrients    | Pine Stands      |            |                 |            | Spruce Stands   |            |                |            |
|--------------|------------------|------------|-----------------|------------|-----------------|------------|----------------|------------|
|              | Normal (Site II) |            | Arid (Site III) |            | Normal (Site I) |            | Arid (Site II) |            |
|              | N3               | N24        | A3              | A24        | N3              | N24        | A3             | A24        |
| Pine wood    |                  |            |                 |            | Spruce wood     |            |                |            |
| K, mg/g      | 2.07±0.25        | 3.31±.25   | 2.61±0.41       | 3.15±0.66  | 1.07±0.17       | 1.57±0.18  | 1.90±0.30      | 2.20±0.23  |
| Ca, mg/g     | 0.57±0.05        | 1.48±0.15  | 0.59±0.03       | 1.77±0.41  | 0.82±0.16       | 1.40±0.13  | 1.63±.27       | 2.23±0.29  |
| Mg, mg/g     | 0.21±0.02        | 0.50±0.05  | 0.27±0.02       | 0.62±0.05  | 0.15±0.02       | 0.27±0.03  | 0.17±0.03      | 0.41±0.04  |
| P, mg/g      | 0.69±0.08        | 0.97±0.07  | 0.78±0.12       | 1.04±0.15  | 0.33±0.05       | 0.40±0.05  | 0.51±0.07      | 0.61±0.06  |
| Fe, µg/g     | 11.4±2.5         | 24.0±2.0   | 3.69±0.88       | 34.6±3.3   | 4.46±1.22       | 7.59±2.64  | 18.0±5.0       | 28.2±3.7   |
| Mn, µg/g     | 77.2±5.5         | 63.9±6.1   | 77.4±7.5        | 40.9±6.7   | 246.4±30.1      | 268.5±30.1 | 142.5±18.0     | 201.8±24.6 |
| Zn, µg/g     | 16.9±1.5         | 33.8±2.9   | 18.6±2.2        | 35.4±3.1   | 22.4±4.0        | 32.4±3.5   | 28.6±5.7       | 53.0±9.4   |
| Cu, µg/g     | 4.54±0.34        | 6.00±0.50  | 4.36±0.42       | 5.66±0.38  | 3.45±0.25       | 4.26±0.26  | 3.38±0.34      | 6.38±0.78  |
| Pine needles |                  |            |                 |            | Spruce needles  |            |                |            |
| K, mg/g      | 5.11±0.24        | 5.76±0.09  | 5.43±0.26       | 5.94±0.16  | 5.80±0.31       | 6.00±0.35  | 5.27±0.25      | 5.48±0.19  |
| Ca, mg/g     | 2.81±0.37        | 2.25±0.09  | 1.74±0.13       | 2.46±0.27  | 6.39±0.41       | 5.40±0.30  | 6.95±0.48      | 7.04±0.28  |
| Mg, mg/g     | 0.43±0.01        | 0.82±0.02  | 0.52±0.02       | 0.79±0.02  | 0.50±0.01       | 0.89±0.03  | 0.54±0.01      | 1.02±0.03  |
| P, mg/g      | 1.38±0.04        | 1.35±0.03  | 1.29±0.02       | 1.24±0.02  | 1.36±0.03       | 1.41±0.04  | 1.54±0.06      | 1.28±0.04  |
| Fe, µg/g     | 78.6±11.3        | 34.2±0.6   | 31.9±1.3        | 44.2±1.9   | 65.1±4.8        | 35.7±1.0   | 45.7±3.0       | 30.3±1.0   |
| Mn, µg/g     | 385.7±29.1       | 187.1±10.3 | 302.9±25.4      | 109.6±8.6  | 1740±174.1      | 1152±95.1  | 726.1±64.6     | 537.5±29.0 |
| Zn, µg/g     | 40.5±1.5         | 36.6±1.2   | 38.4±2.2        | 37.3±2.0   | 34.4±1.5        | 36.2±1.6   | 39.9±1.3       | 41.5±2.0   |
| Cu, µg/g     | 4.12±0.22        | 4.70±0.20  | 3.63±0.16       | 3.74±0.20  | 2.10±0.06       | 4.58±0.17  | 2.63±0.17      | 3.04±0.09  |
| Pine bark    |                  |            |                 |            | Spruce bark     |            |                |            |
| K, mg/g      | 4.77±0.53        | 6.82±0.84  | 4.28±0.47       | 5.21±0.50  | 3.79±0.51       | 4.68±0.42  | 5.36±0.58      | 5.33±0.59  |
| Ca, mg/g     | 4.45±0.76        | 4.51±0.44  | 3.00±0.34       | 3.75±0.56  | 7.15±0.53       | 8.69±0.73  | 7.43±0.77      | 7.74±1.00  |
| Mg, mg/g     | 0.48±0.02        | 0.77±0.05  | 0.50±0.04       | 0.91±0.10  | 0.52±0.04       | 1.02±0.06  | 0.50±0.04      | 0.85±0.08  |
| P, mg/g      | 1.21±0.06        | 1.18±0.08  | 1.15±0.05       | 1.18±0.08  | 1.35±0.09       | 1.58±0.07  | 1.32±0.12      | 1.25±0.07  |
| Fe, µg/g     | 258.0±59.0       | 113.8±10.2 | 76.5±11.7       | 134.9±31.4 | 191.1±19.3      | 133.3±9.0  | 221.9±44.6     | 212.4±31.0 |
| Mn, µg/g     | 157.7±12.1       | 88.0±11.1  | 142.5±20.1      | 47.4±4.8   | 786±125.7       | 735±100.1  | 304.0±44.4     | 328.0±31.0 |
| Zn, µg/g     | 63.4±4.5         | 81.7±4.7   | 58.3±5.0        | 77.4±6.9   | 119.6±7.9       | 148.5±12.6 | 97.1±8.4       | 126.8±12.1 |
| Cu, µg/g     | 6.03±0.43        | 6.50±0.34  | 4.78±0.40       | 5.89±0.52  | 5.87±0.32       | 7.98±0.60  | 6.49±0.78      | 8.90±1.16  |
