# Supplementary material for: Mineral Nutrition of Naturally Growing Scots Pine and Norway Spruce under Limited Water Supply
Source: MDPI journal article supplement (doi:10.3390/plants11192652), 2022-10-09
Supplement: s1 [file s1]

**Table S3.** Contents of lipid peroxidation products and photosynthetic pigments in pine and spruce needles.

| Parameter        | Pine Needles     |           |                 |           | Spruce Needles  |           |                |           |
|------------------|------------------|-----------|-----------------|-----------|-----------------|-----------|----------------|-----------|
|                  | Normal (Site II) |           | Arid (Site III) |           | Normal (Site I) |           | Arid (Site II) |           |
|                  | N3               | N24       | A3              | A24       | N3              | N24       | A3             | A24       |
| MDA,<br>nmol/g   | 52.8±1.6         | 59.2±2.6  | 47.5±2.3        | 60.4±2.3  | 31.6±6.2        | 49.9±3.7  | 36.2±3.7       | 28.7±1.2  |
| 4-HNE,<br>nmol/g | 1145±64.2        | 1074±72.4 | 1119±116.1      | 1324±90.7 | 918±126.7       | 830±91.1  | 911±269.8      | 535±42.8  |
| Chl a,<br>mg/g   | 2.39±0.23        | 1.88±0.09 | 2.48±0.16       | 2.21±0.11 | 2.69±0.14       | 2.93±0.18 | 2.38±0.13      | 2.17±0.07 |
| Chl b,<br>mg/g   | 0.94±0.09        | 0.73±0.04 | 1.01±0.06       | 0.89±0.06 | 1.15±0.06       | 1.22±0.08 | 0.99±0.06      | 0.90±0.03 |
| Car, mg/g        | 0.42±0.03        | 0.35±0.01 | 0.42±0.03       | 0.40±0.01 | 0.43±0.02       | 0.47±0.03 | 0.37±0.02      | 0.36±0.01 |
| Chl a/Chl<br>b   | 2.54±0.02        | 2.56±0.02 | 2.46±0.01       | 2.51±0.04 | 2.35±0.02       | 2.41±0.03 | 2.41±0.02      | 2.41±0.02 |
| Car/Chls         | 0.13±0.00        | 0.14±0.00 | 0.12±0.00       | 0.13±0.00 | 0.11±0.00       | 0.11±0.00 | 0.11±0.00      | 0.12±0.00 |
